# Supplementary material
Source: MDPI journal article supplement (https://www.mdpi.com/2073-4433/7/3/48)
Supplement: s1 [file s1]

# Supplementary Materials: Comparison of Land-Use Regression Modelling with Dispersion and Chemistry Transport Modelling to Assign Air Pollution Concentrations within the Ruhr Area

*Atmosphere* 2016, 7, 48

Frauke Hennig, Dorothea Sugiri, Lilian Tzivian, Kateryna Fuks, Susanne Moebus, Karl-Heinz Jöckel, Danielle Vienneau, Thomas Kuhlbusch, Kees de Hoogh, Michael Memmesheimer, Hermann Jakobs, Ulrich Quass and Barbara Hoffmann

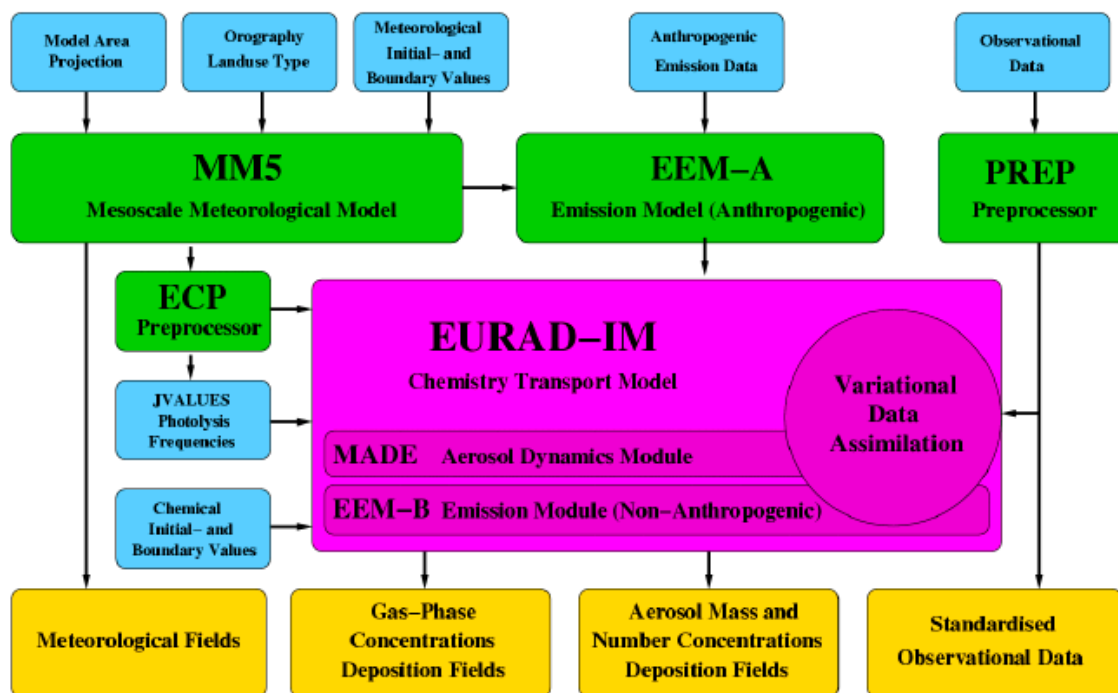

**Figure S1.** Flowchart of the EURAD model system containing the meteorological driver MM5, the pre-processors ECP and PREP, the emission model EEM and the chemistry transport model EURAD (input parameters are shaded in blue, output parameters are shaded in yellow and procedural parts are shaded in green or magenta) [1].

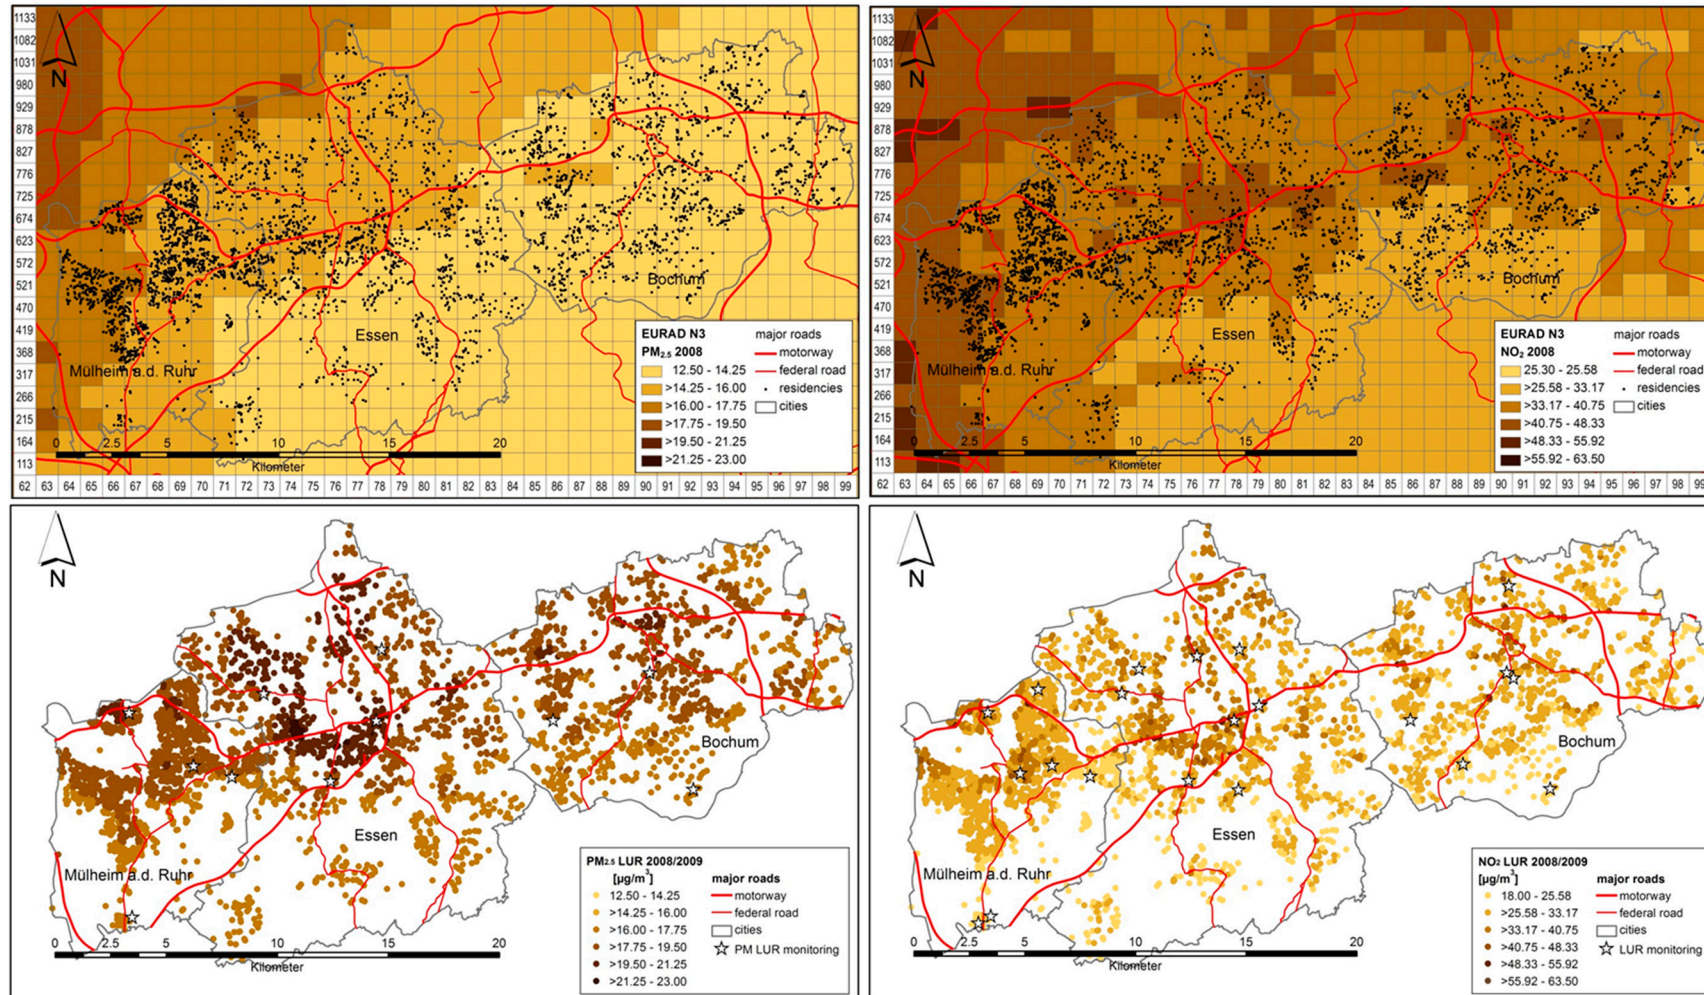

**Figure S2.** Spatial distribution of EURAD-CTM (1 km<sup>2</sup>, yearly mean 2008) and ESCAPE-LUR (point-specific yearly mean October 2008–October 2009) at 4809 residences within the HNR study area for PM<sub>10</sub> (A+C) and NO<sub>2</sub> (B+D).

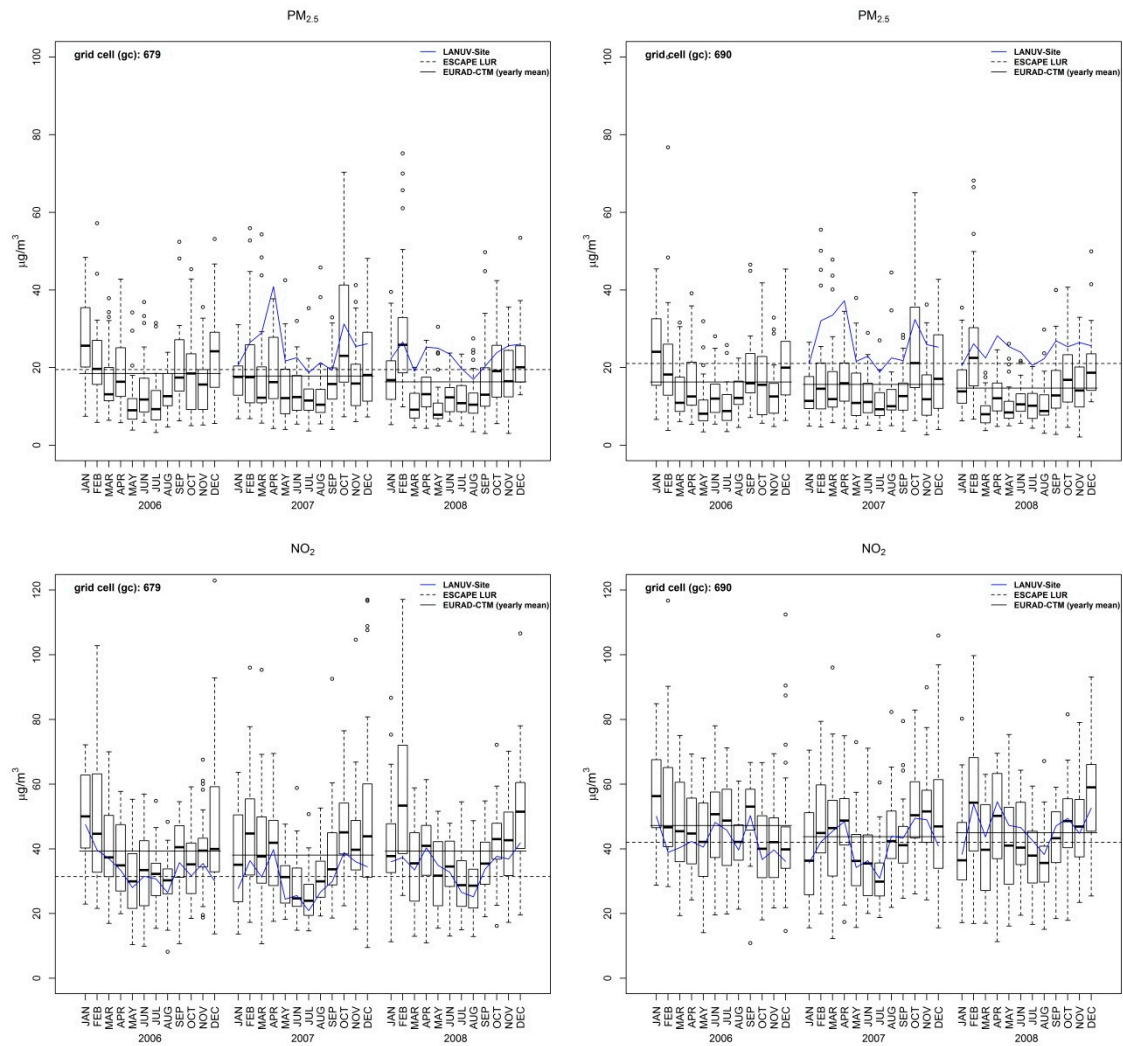

**Figure S3.** Boxplots of air pollution concentrations of monthly-mean  $PM_{10}$  and  $NO_2$  concentrations over three year for a traffic-specific (grid cell: 690), and a background-specific location (grid cell: 679) with annual mean ESCAPE-LUR estimates and annual measurements at LANUV monitoring sites.

**Table S1.** Time and locations of the ESCAPE-measurement campaign.

|                                  |                                                                                                                                                                                                                                                                                                                                                                                                                    |
|----------------------------------|--------------------------------------------------------------------------------------------------------------------------------------------------------------------------------------------------------------------------------------------------------------------------------------------------------------------------------------------------------------------------------------------------------------------|
| Time of measurements             | Autumn:                                                                                                                                                                                                                                                                                                                                                                                                            |
|                                  | <ul style="list-style-type: none"> <li>• 16 October 2008–30 October 2008</li> <li>• 3 November 2008–17 November 2008</li> <li>• 19 November. 2009–3 December 2008</li> <li>• 5 December 2008–19 December 2008</li> </ul>                                                                                                                                                                                           |
|                                  | Winter:                                                                                                                                                                                                                                                                                                                                                                                                            |
| Time of measurements             | <ul style="list-style-type: none"> <li>• 7 January 2009–21 January 2009</li> <li>• 26 January 2009–9 February 2009</li> <li>• 11 February 2009–25 February 2009</li> <li>• 27 February 2009–13 March 2009</li> </ul>                                                                                                                                                                                               |
|                                  | Spring/summer:                                                                                                                                                                                                                                                                                                                                                                                                     |
|                                  | <ul style="list-style-type: none"> <li>• 24 June 2009–8 July 2009</li> <li>• 10 July 2009–24 July 2009</li> <li>• 28 Jul. 2009–11 August 2009</li> <li>• 13 August 2009–27 August 2009</li> </ul>                                                                                                                                                                                                                  |
| Characteristics of site          | Background:                                                                                                                                                                                                                                                                                                                                                                                                        |
|                                  | <ul style="list-style-type: none"> <li>• No influence by sources in the “direct vicinity” of site</li> <li>• No more than 3000 vehicles per day in a 50 m-buffer</li> <li>• No important sources of PM or NO<sub>x</sub> within a 100 m-buffer (combustion source, construction works, small industries, district heating plant, parking areas) and</li> <li>• Distance to large industries &gt; 100 m.</li> </ul> |
|                                  | Traffic:                                                                                                                                                                                                                                                                                                                                                                                                           |
| Filter type of measurement sites | <ul style="list-style-type: none"> <li>• Traffic intensity &gt; 10,000 vehicles per day at site location</li> <li>• Absence of other sources (preferable)</li> <li>• Ground level or first floor measurements (2–3 m).</li> </ul>                                                                                                                                                                                  |
|                                  | NO <sub>2</sub> : Ogawa badges                                                                                                                                                                                                                                                                                                                                                                                     |
|                                  | PM: Harvard Impactors                                                                                                                                                                                                                                                                                                                                                                                              |

**Table S2.** ESCAPE-LUR for PM<sub>2.5</sub>, PM<sub>10</sub> and NO<sub>2</sub>.

| Air Pollutant     | Linear Model                                                 | Predictors                                                                                                                    | Adj. R <sup>2</sup> | LOOCV-R <sup>2</sup> |
|-------------------|--------------------------------------------------------------|-------------------------------------------------------------------------------------------------------------------------------|---------------------|----------------------|
| PM <sub>2.5</sub> | 81.73 + 5.61 × 10 <sup>-8</sup> ×                            | Heavy traffic load in a 1000 m-buffer,                                                                                        | 0.85                | 0.74                 |
|                   | HEAVYTRAFLOAD_1000 + 1.20 ×                                  | Industry in a 5000m-buffer,                                                                                                   |                     |                      |
|                   | 10 <sup>-7</sup> × INDUSTRY_5000 + 1.04 × 10 <sup>-4</sup> × | Population in a 1000m-buffer,                                                                                                 |                     |                      |
|                   | POP_1000 – 2.57 × 10 <sup>-5</sup> × XCOORD                  | X-Coordinate of residential address                                                                                           |                     |                      |
| PM <sub>10</sub>  | 23.86 + 1.47 × 10 <sup>-7</sup> ×                            | Heavy traffic load in a 1000m-buffer,                                                                                         | 0.66                | 0.59                 |
|                   | HEAVYTRAFLOAD_1000 + 2.44 ×                                  | Population in a 1000m-buffer                                                                                                  |                     |                      |
|                   | 10 <sup>-4</sup> × POP_1000                                  |                                                                                                                               |                     |                      |
| NO <sub>2</sub>   | 19.66 + 3.48 × 10 <sup>-7</sup> × INDUSTRY_5000              | Industry in a 5000m-buffer, Population in a 100 m-buffer, inland sea-ports in a 5000 m-buffer, traffic load in a 100 m-buffer | 0.88                | 0.82                 |
|                   | + 0.022 × POP_100 + 4.1 × 10 <sup>-6</sup> ×                 |                                                                                                                               |                     |                      |
|                   | PORT_5000 + 1.31 × 10 <sup>-6</sup> ×                        |                                                                                                                               |                     |                      |
|                   | TRAFLOAD_100                                                 |                                                                                                                               |                     |                      |

**Table S3.** Time and Location of routine monitoring sites, provided by LANUV, within the HNR study area [2].

| Name and Address of Monitoring Site                    | Air Pollutant and Time of Monitoring | Frequency of Monitoring |
|--------------------------------------------------------|--------------------------------------|-------------------------|
| Mülheim-Styrum (STYR)<br>Neustadtstraße, 45476 Mülheim | NO <sub>2</sub> (since 1981)         | Daily                   |
|                                                        | PM <sub>10</sub> (since 2002)        | Daily                   |
|                                                        | PM <sub>2.5</sub> (since 2007)       | 2-day-basis             |
| Essen-Vogelheim (EVOG)<br>Hafenstraße, 45356 Essen     | NO <sub>2</sub> (since 1985)         | Daily                   |
|                                                        | PM <sub>10</sub> (since 2002)        | Daily                   |
|                                                        | PM <sub>2.5</sub> (since 2008)       | 2-day-basis             |
| Essen-Ost (VESN)<br>Steelerstraße, 45138 Essen         | NO <sub>2</sub> (since 1986)         | Daily                   |
|                                                        | PM <sub>10</sub> (since 2003)        | Daily                   |
|                                                        | PM <sub>2.5</sub> (since 2003)       | Daily                   |

**References**

1. Elbern, H.; Friese, E. Eurad-IM Products, Quality and Background Information. Available online: [http://www.uni-koeln.de/math-nat-fak/geomet/eurad/modell/eurad\\_descr\\_e.html](http://www.uni-koeln.de/math-nat-fak/geomet/eurad/modell/eurad_descr_e.html) (accessed on 16 December 2015).
2. Stationen und Messwerte. Available online: <http://www.lanuv.nrw.de/umwelt/luft/immissionen/stationen-und-messwerte/> (accessed on 30 November 2015).
